# Supplementary material
Source: publisher figshare collection journal article supplement (https://gsajournals.figshare.com/articles/dataset/_/7629641)
Supplement: Supplementary file 1 [file 2]

### Step 1. Pre-reporter insertion with ssODN repair template

| Component                                 | Initial concentration |                         | Final concentration |                         | Volume        |
|-------------------------------------------|-----------------------|-------------------------|---------------------|-------------------------|---------------|
|                                           | $\mu\text{M}$         | $\text{ng}/\mu\text{L}$ | $\mu\text{M}$       | $\text{ng}/\mu\text{L}$ | $\mu\text{l}$ |
| Cas9 (IDT)                                | 61                    | 10000                   | 1.53                | 250.00                  | 0.25          |
| ALT-R tracrRNA                            | 320                   | 7098.34                 | 6.40                | 141.97                  | 0.20          |
| ALT-R <i>dpy-10</i> crRNA                 | 50                    | 575.50                  | 1.25                | 14.39                   | 0.25          |
| ALT-R <i>target gene</i> crRNA            | 100                   | ~1180                   | 5.00                | ~59.00                  | 0.50          |
| ssODN <i>dpy-10(cn64)</i> repair template | 32.7                  | 1000                    | 0.92                | 28.00                   | 0.28          |
| ssODN FP 1-3                              | 100                   | ~5300                   | 2.20                | ~116.60                 | 0.22          |
| Nuclease-free $\text{H}_2\text{O}$        |                       |                         |                     |                         | 8.30          |
| Total volume                              |                       |                         |                     |                         | 10.00         |

### Step 2. FP insertion with PCR products

| Component                                 | Initial concentration |                         | Final concentration |                         | Volume            |
|-------------------------------------------|-----------------------|-------------------------|---------------------|-------------------------|-------------------|
|                                           | $\mu\text{M}$         | $\text{ng}/\mu\text{L}$ | $\mu\text{M}$       | $\text{ng}/\mu\text{L}$ | $\mu\text{l}$     |
| Cas9 (IDT)                                | 61                    | 10000                   | 1.53                | 250.00                  | 0.25              |
| ALT-R tracrRNA                            | 320                   | 7098.34                 | 10.25               | 227.15                  | 0.32              |
| ALT-R <i>dpy-10</i> crRNA                 | 100                   | 1150.99                 | 2.00                | 23.02                   | 0.20              |
| ALT-R FP 1-3 crRNA                        | 100                   | ~1180                   | 8.00                | ~94.40                  | 0.80              |
| ssODN <i>dpy-10(cn64)</i> repair template | 32.7                  | 1000                    | 0.92                | 28.00                   | 0.28              |
| FP PCR product                            | ~1.90                 | 1000                    | 1.10                | 570.00                  | 5.70 <sup>a</sup> |
| Nuclease-free $\text{H}_2\text{O}$        |                       |                         |                     |                         | 2.45              |
| Total volume                              |                       |                         |                     |                         | 10.00             |

### One-shot FP insertion

| Component                                 | Initial concentration |                         | Final concentration |                         | Volume            |
|-------------------------------------------|-----------------------|-------------------------|---------------------|-------------------------|-------------------|
|                                           | $\mu\text{M}$         | $\text{ng}/\mu\text{L}$ | $\mu\text{M}$       | $\text{ng}/\mu\text{L}$ | $\mu\text{l}$     |
| Cas9 (IDT)                                | 61                    | 10000                   | 1.53                | 250.00                  | 0.25              |
| ALT-R tracrRNA                            | 320                   | 7098.34                 | 16.00               | 354.92                  | 0.50              |
| ALT-R <i>dpy-10</i> crRNA                 | 100                   | 1150.99                 | 2.00                | 23.02                   | 0.20              |
| ALT-R <i>target gene</i> crRNA            | 100                   | ~1180                   | 5.00                | ~59.00                  | 0.50              |
| ALT-R FP 1-3 crRNA                        | 100                   | ~1180                   | 5.00                | ~59.00                  | 0.50              |
| ssODN FP 1-3                              | 100                   | ~5300                   | 4.00                | ~212.00                 | 0.40              |
| ssODN <i>dpy-10(cn64)</i> repair template | 32.7                  | 1000                    | 0.98                | 30.00                   | 0.30              |
| FP PCR product                            | ~1.90                 | 1000                    | 1.10                | 570.00                  | 5.70 <sup>a</sup> |
| Nuclease-free $\text{H}_2\text{O}$        |                       |                         |                     |                         | 1.65              |
| Total volume                              |                       |                         |                     |                         | 10.00             |

<sup>a</sup> adjust the volume depending on the molecular weight of the PCR product to reach a final concentration of 1.10  $\mu\text{M}$ .

Preparation of injection mix:

1. Pipette the required volume of nuclease-free H<sub>2</sub>O.
2. To the nuclease-free H<sub>2</sub>O, add the listed reagents in the following order: target gene crRNA, *dpy-10* crRNA, tracrRNA, and Cas9.
3. Incubate at 37° for 10 minutes.
4. Add ssODNs and/or PCR product repair templates.
5. Centrifuge at 13,200 rpm for 2 minutes.
6. Keep the mix over ice prior to loading capillary needles.
7. Excess mix can be stored at -20° and reused.

**Figure S3. Standard composition of injection mixes for Nested CRISPR**
