# Supplementary material
Source: publisher figshare collection journal article supplement (https://gsajournals.figshare.com/articles/dataset/_/7629641)
Supplement: Supplementary file 2 [file 2]

**Table S5. List of ssODNs used for Nested CRISPR Step 1**

| Allele                                                              | ssODN repair template (5' to 3')                                                                                                                                                                                                |
|---------------------------------------------------------------------|---------------------------------------------------------------------------------------------------------------------------------------------------------------------------------------------------------------------------------|
| <b><i>gtbp-1::EGFP 1-3</i></b><br>(sense)                           | CGGTTCCGGGTGGTGTCTCCACGAGGTGGTATGCGCTCCAAGGGAGAGGAGC<br>TCTTACC CGGAGTCGTCCCAATCCTCGTCGAGCTCGACGGAGTCAAGGAGT<br>TCGTCACCGCTGCCGGAATCACCCACGGAATGGACGAGCTCTACAAGAGC<br>GGTTTCCAAAATGCGGGACAAAAT <b>TAG</b> AAG                   |
| <b><i>pgl-1::EGFP 1-3</i></b><br>(sense)                            | CGTGGACGTGGTGGTTACGGGGGTCGTGGTGGACGIGGCGGCTT <b>TCCAAG</b><br>GGAGAGGAGCTCTTACC CGGAGTCGTCCCAATCCTCGTCGAGCTCGACGGA<br>GTCAAGGAGTTCGTACCGCTGCCGGAATCACCCACGGAATGGACGAGCT<br>CTACAAG <b>TAA</b> ACTCCAATATTGAATGTTTAATTGTTTTTAAG  |
| <b><i>prpf-4::EGFP 1-3</i></b><br>(antisense)                       | TTAGAGATCACGAAAAAATTTGGGAAATGT <b>TTA</b> CTTGTAGAGCTCGTCC<br>ATTCCGTGGGTGATTCCGGCAGCGGTGACGAACCTCTTGAATCCGTCGAGC<br>TCGACGAGGATTGGGACGACTCCGGTGAAGAGCTCCTCTCCCTTGGACTTG<br>ATAGGTATGGTGAAGAATGGGTGTTTGAGAGCCT                  |
| <b><i>ubh-4::EGFP1-3</i></b><br>(sense)                             | AAGAAAAATCCAAGCTGAATACAGACATAACCAAGTCCAAGGGAGAGGAG<br>CTCTTACC CGGAGTCGTCCCAATCCTCGTCGAGCTCGACGGAGTCAAGGAG<br>TTCGTACCGCTGCCGGAATCACCCACGGAATGGACGAGCTCTACAAGCTT<br>GAATTGAAGAGAAAAACAAT <b>TAG</b> ATATTGCATTCT                |
| <b>EGFP 1-3::<i>nfki-1</i></b><br>(sense)                           | GTTTTCCAAAATTACGTCGTTTGTTCAGCCATGTCCAAGGGAGAGGAGCT<br>CTTACC CGGAGTCGTCCCAATCCTCGTCGAGCTCGACGGAGTCAAGGAGTT<br>CGTACCGCTGCCGGAATCACCCACGGAATGGACGAGCTCTACAAGGCAA<br>CCGTTGCCCCCAAGGAAAATGCCTTGTGCT                               |
| <b><i>prpf-4::</i></b><br><b>2xTY1::EGFP::3xFLAG</b><br>(antisense) | <b>TTA</b> GAGATCACGAAAAAATTTGGGAAATGT <b>TTA</b> CTTGTCTCGTCATCCT<br>TGTAGTCAATGTCATGATCTTTATAGTCTCT <b>TC</b> CGAGTGGATCTTGGTTGTGT<br>GGACTTCATCCAGCGGGTCTGATTGGTATGC <b>ACTTC</b> CTTGATAGGTATGGT<br>GAAGAATGGGTGTTTGAGAGCCT |
| <b><i>gtbp-1::mCherry 1-3</i></b><br>(sense)                        | CGGTTCCGGGTGGTGTCTCCACGAGGTGGTATGCGCTCCAAGGGAGAGGAGG<br>ACAACATGGCCATCATCAAGGAGTTCATGCGTTTCAAGGCCGAGGGACGTC<br>ACTCCACCGGAGGAATGGACGAGCTCTACAAGAGCGGTTTCCAAAATGCG<br>GGACAAAAT <b>TAG</b> AAG                                   |
| <b><i>pgl-1::mCherry 1-3</i></b><br>(sense)                         | CGTGGACGTGGTGGTTACGGGGGTCGTGGTGGACGIGGCGGCTT <b>TCCAAG</b><br>GGAGAGGAGGACAACATGGCCATCATCAAGGAGTTCATGCGTTTCAAGGC<br>CGAGGGACGTCACTCCACCGGAGGAATGGACGAGCTCTACAAG <b>TAA</b> ACTC<br>CAACTATTGAATGTTTAATTGTTTTTAAG                |
| <b><i>prpf-4::mCherry 1-3</i></b><br>(antisense)                    | TTAGAGATCACGAAAAAATTTGGGAAATGT <b>TTA</b> CTTGTAGAGCTCGTCC<br>ATTCTCCGGTGGAGTGACGTCCCTCGGCCTTGAAACGCATGAATCCTTGA<br>TGATGGCCATGTTGTCTCTCTCCCTTGGACTTGATAGGTATGGTGAAGAA<br>TGGGTGTTTGAGAGCCT                                     |
| <b>mCherry 1-3::<i>sftb-1</i></b><br>(sense)                        | CTTCCATATAATCAATATTGATTGTAGATCGATGTCCAAGGGAGAGGAGGA<br>CAACATGGCCATCATCAAGGAGTTCATGCGTTTCAAGGCCGAGGGACGTCA<br>CTCCACCGGAGGAATGGACGAGCTCTACAAGTCAAGATCTGGCGAGGCTTA<br>TGCGCAGGAGTTGAACCGCAAAAG                                   |
| <b>K12C11.3p::mCherry 1-3</b><br>(sense)                            | GCCTGACTATACTTATTTTTATGAGCAGAAAATGTCCAAGGGAGAGGAGG<br>ACAACATGGCCATCATCAAGGAGTTCATGCGTTTCAAGGCCGAGGGACGTC<br>ACTCCACCGGAGGAATGGACGAGCTCTACAAG <b>TGA</b> ATCGATCGATAATGTT<br>TATATAATTTTTGTTT                                   |
| <b>F27C1.2::wrmScarlet 1-3</b>                                      | TGATGGAGAAGTGACGGATTGTTCCAAACCGATGCTTGCCAGCTCAGCAA<br>GGGAGAGGCAGTTATCAAGGAGTTCATGCGTTTCAAGGTCCACATGGAGG<br>GATCCATGACCGAGGGACGTCACTCCACCGGAGGAATGGACGAGCTCTAC<br>AAG <b>TAA</b> TAATTGCGATCTCCAATCTCAATCCTCAAACA               |

Green, red, and dark red nucleotides represent EGFP 1-3, mCherry 1-3, and wrmScarlet 1-3 sequences, respectively; whereas purple and orange nucleotides represent FLAG and TY1 fragments, respectively. Nucleotides in blue and bold represent start and stop codons, respectively; and underscored nucleotides represent silent mutations.
