# Supplementary material
Source: publisher figshare collection journal article supplement (https://gsajournals.figshare.com/articles/dataset/_/7629641)
Supplement: Supplementary file 3 [file 2]

**Table S4. List of crRNAs used for Nested CRISPR Step 1**

| Target gene          | Sequence (5' to 3')  | Cut site location | Distance of insertion from cut site |
|----------------------|----------------------|-------------------|-------------------------------------|
| <b><i>prpf-4</i></b> | TGGGAAATGTATTATTTGAT | C-ter             | 3 bp                                |
| <b><i>gtbp-1</i></b> | CCACGAGGTGGTATGCGCAG | C-ter             | 1 bp                                |
| <b><i>pgl-1</i></b>  | GGGGGTCGTGGTGGACGCGG | C-ter             | 10 bp                               |
| <b><i>ubh-4</i></b>  | TTTTCTCTTCAATTCAAGCT | C-ter             | 0 bp                                |
| <b><i>nfki-1</i></b> | CTTGGGGGCAACGGTTGCCA | N-ter             | 1 bp                                |
| <b><i>sftb-1</i></b> | TGTAGATCGATGTCTCGTTC | N-ter             | 5 bp                                |
| <b>F27C1.2</b>       | CAATTATTAATGACACGCAT | C-ter             | 8 bp                                |
| <b>K12C11.3</b>      | GCTATTTTTTCTTCGGATCT | C-ter             | 9 bp                                |
| <b>K12C11.3</b>      | GAGCCATCGTAGACGTGTTA | N-ter             | 8 bp                                |
