# Supplementary material
Source: publisher figshare collection journal article supplement (https://gsajournals.figshare.com/articles/dataset/_/7629641)
Supplement: Supplementary file 4 [file 2]

**Table S6. List of Nested CRISPR Universal Sequences**

| Reagent                                             | Sequence (5' to 3')                                                                                                                    |
|-----------------------------------------------------|----------------------------------------------------------------------------------------------------------------------------------------|
| <b>EGFP Step 2 crRNA</b>                            | CGTCGAGCTCGACGGAGTCA                                                                                                                   |
| <b>mCherry Step 2 crRNA</b>                         | GTTTCATGCGTTTCAAGGCCG                                                                                                                  |
| <b>wrmScarlet Step 2 crRNA</b>                      | CATGGAGGGATCCATGACCG                                                                                                                   |
| <b>2xTY1::EGFP::3xFLAG Step 2 crRNA</b>             | CACAAACCAAGATCCACTCG                                                                                                                   |
| <b>2xTY1::EGFP::3xFLAG Step 2 crRNA<sup>a</sup></b> | TCTCCATCGTGGTCTTTGAG                                                                                                                   |
| <b>EGFP 1-3 block</b>                               | TCCAAGGGAGAGGAGCTCTTCACCGAGTCGTCCCAATCCTCGT<br>CGAGCTCGACGGAGTCA <b>AGG</b> AGTTCGTACCGCTGCCGGAATC<br>ACCCACGGAATGGACGAGCTCTACAAG      |
| <b>mCherry 1-3 block</b>                            | TCCAAGGGAGAGGAGGACAACATGGCCATCATCAAGGAGTTCA<br>TGCGTTTCAAGGCCG <b>AGG</b> GACGTCCTCCACCGAGGAATGGA<br>CGAGCTCTACAAG                     |
| <b>wrmScarlet 1-3 block</b>                         | GTCAGCAAGGGAGAGGCAGTTATCAAGGAGTTCATGCGTTTCA<br>AGGTCCACATGGAGGGATCCATGACCG <b>AGG</b> GACGTCCTCCAC<br>CGGAGGAATGGACGAGCTCTACAAG        |
| <b>2xTY1::3xFLAG block</b>                          | GAAGTGCATACCAATCAGGACCCGCTGGATGAAGTCCACACAA<br>ACCAAGATCCACTCG <b>AGG</b> AGACTATAAAGATCATGACATTGACT<br>ACAAGGATGACGACGACAAG           |
| <b>2xTY1::3xFLAG block<sup>a</sup></b>              | GAAGTGCATACCAATCAGGACCCGCTGGATGAAGTCCACACAA<br>ACCAAGAT <b>CC</b> ACTCAAAGACCACGATGGAGACTATAAAGATCA<br>TGACATTGACTACAAGGATGACGACGACAAG |
| <b>Fwd primer to amplify EGFP 1-2-3</b>             | CCAAGGGAGAGGAGCTCTTCA                                                                                                                  |
| <b>Rev primer to amplify EGFP 1-2-3</b>             | CTTGTAGAGCTCGTCCATTC                                                                                                                   |
| <b>Fwd primer to amplify mCherry 1-2-3</b>          | TCCAAGGGAGAGGAGGACAA                                                                                                                   |
| <b>Rev primer to amplify mCherry 1-2-3</b>          | CTTGTAGAGCTCGTCCATTC                                                                                                                   |
| <b>Fwd primer to amplify mScarlet 1-2-3</b>         | GTCAGCAAGGGAGAGGCAGTTAT                                                                                                                |

|                                                       |                        |
|-------------------------------------------------------|------------------------|
| <b>Rev primer to amplify mScarlet 1-2-3</b>           | CTTGTAGAGCTCGTCCATTCCT |
| <b>Fwd primer to amplify 2xTY1::EGFP::3xFLAG</b>      | ATACCAATCAGGACCCGCTG   |
| <b>Rev primer to amplify 2xTY1::EGFP::3xFLAG</b>      | TGTCGTCGTCATCCTGTAGT   |
| <b>Internal Fwd primer to genotype EGFP Step 2</b>    | CATGCCAGAGGGATACGTCC   |
| <b>Internal Rev primer to genotype mCherry Step 2</b> | TTGGGTTCCCTCGTATGGAC   |
| <b><i>dpy-10</i> co-CRISPR crRNA</b>                  | GCTACCATAGGCACCACGAG   |

Nucleotides in bold represent PAM sequences. Two designs are provided for the 2xTY1::EGFP::3xFLAG construct and step 2 crRNA: the ones used in this study and a hypothetical improved design based on *in silico* predictions. <sup>a</sup>These are the recommended designs predicted to have a more efficient guide sequence.
