# Supplementary material
Source: publisher figshare collection journal article supplement (https://gsajournals.figshare.com/articles/dataset/_/7629641)
Supplement: Supplementary file 6 [file 2]

**Table S2. Sequences of ssODN bridges in experiments coupled with megamers**

| Locus                        | 5' bridge                                                                           | 3' bridge                                                                           |
|------------------------------|-------------------------------------------------------------------------------------|-------------------------------------------------------------------------------------|
| <i>sftb-1</i> (sense)        | TCTCCATATAATCAATATTGATTGTAG<br>ATCGATGTCCAAGGGAGAGGAGCTCTT<br>CACCGGAGTCGTCCC       | CCGGAATCACCCACGGAATGGACGAG<br>CTCTACAAGTCAAGTTCAGGCGAGGCT<br>TATGCGCAGGAGTTGAACCGCA |
| <i>sftb-1</i><br>(antisense) | TGCGGTTCAACTCCTGCGCATAAGCCTC<br>GCCTGAACTTGACTTGTAGAGCTCGTCC<br>ATTCCGTGGGTGATTCCGG | GGGACGACTCCGGTGAAGAGCTCCTCT<br>CCCTTGGACATCGATCTACAATCAATAT<br>TGATTATATGGAAGA      |
| <i>ubh-4</i><br>(antisense)  | CAGGATCGCTTTCAATCAAGCACCAGC<br>TTCCAGCATCTGTCTTGTAGAGCTCGTC<br>CATTCCGTGGGTGATTCCGG | GGGACGACTCCGGTGAAGAGCTCCTCT<br>CCCTTGGACATCTGAAAACAAAAATAA<br>ACTTAGTTTTTTCAAA      |

The sequences are given in a 5' to 3' direction. The nucleotides in green represent parts overlapping with the GFP megamer.
