# Supplementary material
Source: publisher figshare collection journal article supplement (https://gsajournals.figshare.com/articles/dataset/_/7629641)
Supplement: Supplementary file 7 [file 2]

| PCR mix                |                                                |
|------------------------|------------------------------------------------|
| Component              | Volume                                         |
| H <sub>2</sub> O       | 303.2 µl                                       |
| 5x Phusion HF buffer   | 80.0 µl                                        |
| Fwd primer 100 µM      | 2.0 µl (final concentration 0.5 µM)            |
| Rev primer 100 µM      | 2.0 µl (final concentration 0.5 µM)            |
| Plasmid (100 ng/µl)    | 0.8 µl (final concentration 0.2 ng/µl)         |
| Phusion DNA polymerase | 4.0 µl                                         |
| dNTPs 10 mM            | 8.0 µl                                         |
| <b>TOTAL</b>           | <b>400.0 µl</b> split into 8 x 50-µl reactions |

  

| PCR program – EGFP |          |            |
|--------------------|----------|------------|
| 98°                | – 2 min  | x35 cycles |
| 98°                | – 30 sec |            |
| 60°                | – 30 sec |            |
| 72°                | – 45 sec |            |
| 72°                | – 10 min |            |
| 4°                 | – ∞      |            |

  

| PCR program - wrmScarlet |          |            |
|--------------------------|----------|------------|
| 98°                      | – 30 sec | x35 cycles |
| 98°                      | – 10 sec |            |
| 51°                      | – 15 sec |            |
| 72°                      | – 15 sec |            |
| 72°                      | – 10 min |            |
| 4°                       | – ∞      |            |

  

| PCR program - mCherry |          |            |
|-----------------------|----------|------------|
| 98°                   | – 2 min  | x35 cycles |
| 98°                   | – 30 sec |            |
| 67°                   | – 30 sec |            |
| 72°                   | – 45 sec |            |
| 72°                   | – 10 min |            |
| 4°                    | – ∞      |            |

  

| PCR program – 2xTY1::EGFP::3xFLAG |          |            |
|-----------------------------------|----------|------------|
| 98°                               | – 2 min  | x35 cycles |
| 98°                               | – 30 sec |            |
| 60°                               | – 30 sec |            |
| 72°                               | – 45 sec |            |
| 72°                               | – 10 min |            |
| 4°                                | – ∞      |            |

**Figure S2. Reagents and conditions for generation of universal PCR product repair templates for Nested CRISPR Step 2**
