# Supplementary material
Source: publisher figshare collection journal article supplement (https://gsajournals.figshare.com/articles/dataset/_/7629641)
Supplement: Supplementary file 8 [file 2]

**Table S7. List of generated strains**

| Experiment                                            | Strain | Genotype                                               |
|-------------------------------------------------------|--------|--------------------------------------------------------|
| <b><i>prpf-4</i> EGFP Step 1</b>                      | CER352 | <i>prpf-4(cer40[prpf-4::egfp1-3]) I</i>                |
| <b><i>prpf-4</i> EGFP Step 2</b>                      | CER372 | <i>prpf-4(cer54[prpf-4::egfp]) I</i>                   |
| <b><i>prpf-4</i> EGFP Step 2 (synthetic sgRNA)</b>    | CER402 | <i>prpf-4(cer82[prpf-4::egfp]) I</i>                   |
| <b><i>prpf-4</i> mCherry Step 1</b>                   | CER383 | <i>prpf-4(cer62[prpf-4::mcherry1-3]) I</i>             |
| <b><i>prpf-4</i> mCherry Step 2</b>                   | CER398 | <i>prpf-4(cer80[prpf-4::mcherry]) I</i>                |
| <b><i>prpf-4</i> mCherry Step 2 (synthetic sgRNA)</b> | CER404 | <i>prpf-4(cer84[prpf-4::mcherry]) I</i>                |
| <b><i>prpf-4</i> 2xTY1::EGFP::3xFLAG Step 1</b>       | CER470 | <i>prpf-4(cer122[prpf-4::2xTY1 + 3xFLAG]) I</i>        |
| <b><i>prpf-4</i> 2xTY1::EGFP::3xFLAG Step 2</b>       | CER472 | <i>prpf-4(cer124[prpf-4::2xTY1 + egfp + 3xFLAG]) I</i> |
| <b><i>gtbp-1</i> EGFP Step 1</b>                      | CER371 | <i>gtbp-1(cer53[gtbp-1::egfp1-3]) IV</i>               |
| <b><i>gtbp-1</i> EGFP Step 2</b>                      | CER408 | <i>gtbp-1(cer88[gtbp-1::egfp]) IV</i>                  |
| <b><i>gtbp-1</i> EGFP Step 2 (synthetic sgRNA)</b>    | CER410 | <i>gtbp-1(cer90[gtbp-1::egfp]) IV</i>                  |
| <b><i>gtbp-1</i> mCherry Step 1</b>                   | CER380 | <i>gtbp-1(cer59[gtbp-1::egfp1-3]) IV</i>               |
| <b><i>gtbp-1</i> mCherry Step 2</b>                   | CER409 | <i>gtbp-1(cer89[gtbp-1::egfp]) IV</i>                  |
| <b><i>pgl-1</i> EGFP Step 1</b>                       | CER376 | <i>pgl-1(cer57[pgl-1::egfp1-3]) IV</i>                 |
| <b><i>pgl-1</i> EGFP Step 2</b>                       | CER418 | <i>pgl-1(cer96[pgl-1::egfp]) IV</i>                    |
| <b><i>pgl-1</i> mCherry Step 1</b>                    | CER381 | <i>pgl-1(cer60[pgl-1::mcherry1-3]) IV</i>              |
| <b><i>pgl-1</i> mCherry Step 2</b>                    | CER414 | <i>pgl-1(cer70[pgl-1::mcherry]) IV</i>                 |
| <b>K12C11.3 mCherry Step 1</b>                        | CER396 | <i>K12C11.3(cer69[K12C11.3p::mcherry1-3]) I</i>        |
| <b>K12C11.3 mCherry Step 2</b>                        | CER406 | <i>K12C11.3(cer86[K12C11.3p::mcherry]) I</i>           |
| <b><i>ubh-4</i> EGFP Step 1</b>                       | CER378 | <i>ubh-4(cer67[ubh-4::egfp1-3]) II</i>                 |
| <b><i>ubh-4</i> EGFP Step 2</b>                       | CER395 | <i>ubh-4(cer68[ubh-4::egfp]) II</i>                    |
| <b><i>nfki-1</i> EGFP Step 1</b>                      | CER469 | <i>nfki-1(cer121[egfp1-3::nfki-1]) X</i>               |
| <b><i>nfki-1</i> EGFP Step 2</b>                      | CER461 | <i>nfki-1(cer116[egfp::nfki-1]) X</i>                  |
| <b><i>sftb-1</i> mCherry Step 1</b>                   | CER426 | <i>sftb-1(cer103[mcherry 1-3::sftb-1]) III</i>         |
| <b><i>sftb-1</i> mCherry Step 2</b>                   | CER444 | <i>sftb-1(cer114[mcherry::sftb-1]) III</i>             |
| <b>F27C1.2 wrmScarlet Step 2</b>                      | CER438 | <i>F27C1.2(cer111[F27C1.2::wrmscarlet]) I</i>          |
