# Supplementary material
Source: publisher figshare collection journal article supplement (https://gsajournals.figshare.com/articles/dataset/_/7629641)
Supplement: Supplementary file 9 [file 2]

**Table S8. List of external primers for genotyping**

| Gene                 | Sequence (5' to 3')       |                          |
|----------------------|---------------------------|--------------------------|
|                      | Forward                   | Reverse                  |
| <b>F27C1.2</b>       | GCAGTTCTCCAACTCCGAAA      | CCGCAGGAGAGAAACTAAGG     |
| <b><i>gtbp-1</i></b> | AGCTCAGGCTGAATCGGAAA      | ACAAGAAGGAAAAAGGAGAACGGA |
| <b>K12C11.3</b>      | CTTTGAGCGGAGTGTCGTTG      | AAGTTCATTGGAGCGCGTTT     |
| <b><i>nfki-1</i></b> | TATAGTTCAACCGGCAGAG       | TGAATGTCGTGCTGAGAAAT     |
| <b><i>pgl-1</i></b>  | AGGAAACCACAGTTGCTGACA     | AATGTGCGTAAACGTGTAAGT    |
| <b><i>prpf-4</i></b> | GGCAGAGGACATGAAGATCCA     | GGTTCGTCCTGGGAACATGA     |
| <b><i>sftb-1</i></b> | AGCTATCGAAGTTTAGGATGTTGTT | CGGTTCCAATCGAGTCTAGGTA   |
| <b><i>ubh-4</i></b>  | CGTCACAATTATACTCCG        | CAAAAACAATCAAGAACCC      |
