# Supplementary material
Source: publisher figshare collection journal article supplement (https://gsajournals.figshare.com/articles/dataset/_/7629641)
Supplement: Supplementary file 10 [file 2]

**Table S3. Sequences of GFP and mCherry megamers**

| <b>Megamer</b>                                                    | <b>Sequence (5' to 3')</b>                                                                                                                                                                                                                                                                                                                                                                                                                                                                                                                                                                                                                                                                                                                                                                                                                                                                          |
|-------------------------------------------------------------------|-----------------------------------------------------------------------------------------------------------------------------------------------------------------------------------------------------------------------------------------------------------------------------------------------------------------------------------------------------------------------------------------------------------------------------------------------------------------------------------------------------------------------------------------------------------------------------------------------------------------------------------------------------------------------------------------------------------------------------------------------------------------------------------------------------------------------------------------------------------------------------------------------------|
| <b>GFP sense (with 2 introns)<br/>815 nt</b>                      | TCCAAGGGAGAGGAGCTCTTACC GGAGTCGTCCCAATCCTCGTCGAGCTCGA<br>CGGAGACGTCAACGGACACAAGTTCTCCGTCTCAGGAGAGGGAGAGGGAGAC<br>GCCACCTACGGAAAGCTCACCCCTCAAGTTCATCTGCACCACCGGAAAGCTCCC<br>AGTCCCATGGCCAACCCTCGTCACCACCTTCACTTACGGAGTCCAATGCTTCTC<br>CCGTTACCCAGACCACATGAAGCGTCACGACTTCTTCAAGTCCGCCATGCCAG<br>AGGGATACGTCCAAGAGCGTACCATCTTCTTCAAGGtaagtttaacattaataacta<br>actaaccctgattatttaattttcagGACGACGGAAACTACAAGACCCGTGCCGAGGTC<br>AAGTTCGAGGGAGACACCCTCGTCAACCGTATCGAGCTCAAGtaagtttaacagt<br>tcggtactaactaaccatacatatttaattttcagGGAATCGACTTCAAGGAGGACGGAAAC<br>ATCCTCGGACACAAGCTCGAATAACAATACTACAACCTCCACAACGTCTACATCATG<br>GCCGACAAGCAAAAAGAACGGAATCAAGGTCAACTTCAAGATCCGTCACAACAT<br>CGAGGACGGATCTGTCCAACCTCGCCGACCACTACCAACAAAACACCCCAATCG<br>GAGACGGACCAGTCCTCCTCCAGACAACCACTACCTCTCCACCCAATCCGCC<br>CTCTCCAAGGACCCAAACGAGAAGCGTGACCACATGGTCTCAAGGAGTTCGT<br>CACCGCTGCCGGAATCACCCACGGAATGGACGAGCTCTACAAG |
| <b>GFP antisense<br/>(with 2 introns)<br/>815 nt</b>              | CTTGTAGAGCTCGTCCATTCCGTGGGTGATTCCGGCAGCGGTGACGAACTCCTT<br>GAGGACCATGTGGTCACGCTTCTCGTTTGGGTCCTTGAGAGGGCGGATTGGG<br>TGGAGAGGTAGTGGTTGTCTGGGAGGAGGACTGGTCCGTCTCCGATTGGGGTG<br>TTTTGTTGGTAGTGGTCGGCAGTTGGACAGATCCGTCCCTCGATGTTGTGACGG<br>ATCTTGAAGTTGACCTTGATTCCGTTCTTTGCTTGTGCGCCATGATGTAGACGT<br>TGTGGGAGTTGTAGTTGTATTGAGCTTGTGTCCGAGGATGTTCCGTCTCCTT<br>GAAGTCGATTCCtgaaaatttaaatatgtatggttagtagtaccgaactgtttaacttacCTTG<br>AGCTCGATACGGTTGACGAGGGTGTCTCCCTCGAATTGACCTCGGCACGGGT<br>CTTGTAGTTTCCGTCTGCTctgaaaatttaataatcagggttagtagtattaattaatgtttaact<br>tacCTTGAAGAAGATGGTACGCTCTTGGACGTATCCCTCTGGCATGGCGGACTT<br>GAAGAAGTCGTGACGCTTCATGTGGTCTGGGTAAACGGGAGAAGCATTGGACTC<br>CGTAAGTGAAGGTGGTGACGAGGGTTGGCCATGGGACTGGGAGCTTTCCGGT<br>GGTGCAGATGAACTTGAGGGTGAGCTTTCCGTAGGTGGCGTCTCCCTCTCCCTC<br>TCCTGAGACGGAGAACTTGTGTCCGTTGACGTCTCCGTGAGCTCGACGAGGA<br>TTGGGACGACTCCGGTGAAGAGCTCCTCTCCCTTGA         |
| <b>mCherry<br/>antisense<br/>(without<br/>introns)<br/>702 nt</b> | CTTGTAGAGCTCGTCCATTCCGTGGAGTGACGTCCCTCGGCACGCTCGTA<br>TTGCTCGACGATGGTGTAGTCTCGTTGTGGGAGGTGATGTCGAGCTTGATGTT<br>GACGTTGTAGGCTCCTGGGAGTTGGACTGGCTTCTTGGCCTTGAGGTGGTCTT<br>GACCTCGGCGTCGTAGTGTCTCCGTCTTGAGCTTGAGACGTTGCTTGATCTC<br>TCCCTTGAGGGCTCCGTCTCTGGGTACATACGCTCGGAGGAGGCCTCCCATC<br>CCATGGTCTTCTTTGCATGACTGGTCCGTGCGATGGGAAGTTGGTTCCACGGA<br>GCTTGACCTTGTAGATGAACTCTCCGTCTTGAGGGAGGAGTCTTGGGTGACG<br>GTGACGACTCCTCCGTCTCGAAGTTCATGACACGCTCCCACTTGAATCCCTCT<br>GGGAAGGAGAGCTTGAGGTAGTCTGGGATGTGCGGTGGGTGCTTGACGTAGG<br>CCTTTGATCCGTACATGAATTGTGGGGAGAGGATGTCCCAGGCGAATGGGAGT<br>GGTCTCCCTTGGTGACCTTGAGCTTGGCGGTTTGGGTTCCCTCGTATGGACGT<br>CCCTCTCCCTCTCCCTCGATCTCGAAGTCTGTCCGTTGACTGATCCCTCCATGT<br>GGACCTTGAAACGCATGAACTCCTTGATGATGGCCATGTTGTCTCTCTCCCT<br>GGA                                                                                                                                   |

Exons and introns are represented in uppercase and lowercase, respectively.
