# Supplementary material
Source: publisher figshare collection journal article supplement (https://gsajournals.figshare.com/articles/dataset/_/7629641)
Supplement: Supplementary file 11 [file 2]

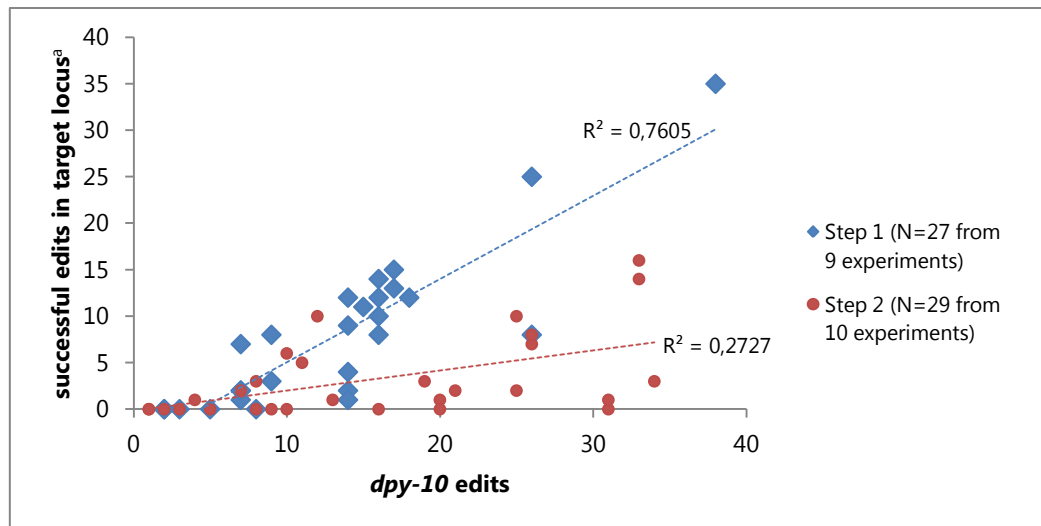

**Figure S1: Correlation between the number of *dpy-10* edits and successful edits in the target locus** (<sup>a</sup> based on bands of the correct size after screening by PCR). Each point represents an injected  $P_0$  worm giving rise to *dpy-10* edited  $F_1$  progeny. There is a strong positive correlation between the number of *dpy-10* edited progeny and the number of successful edits in the target locus in step 1 experiments, while a moderate positive correlation is observed in step 2 experiments. This demonstrates that jackpot plates with a higher number of *dpy-10* edited  $F_1$ s are more likely to possess the desired edit at the target locus.
